# Supplementary material for: Long-Term PDE-5A Inhibition Improves Myofilament Function in Left and Right Ventricular Cardiomyocytes through Partially Different Mechanisms in Diabetic Rat Hearts
Source: MDPI journal article supplement (doi:10.3390/antiox10111776), 2021-11-06
Supplement: s1 [file s1]

**Left ventricle Cardiac Troponin I original membranes Ser-22/23-P**

1. Lean
2. Lean+Vard
3. ZDF
4. ZDF+Vard

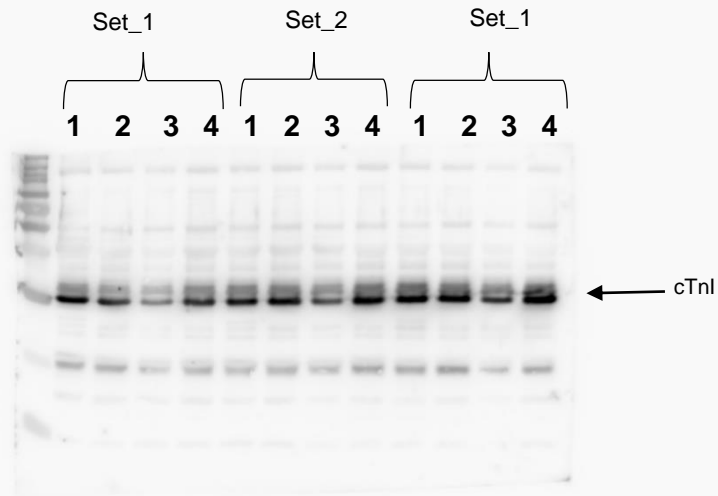

**Left ventricle Cardiac Troponin I original membranes Ser-22/23-P-Blot stain**

1. Lean
2. Lean+Vard
3. ZDF
4. ZDF+Vard

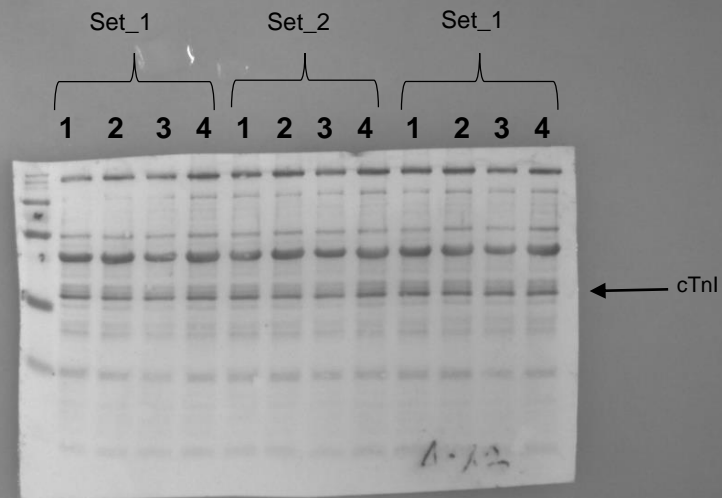

# Left ventricle Cardiac Troponin I original membranes Ser-22/23-P

1. Lean
2. Lean+Vard
3. ZDF
4. ZDF+Vard

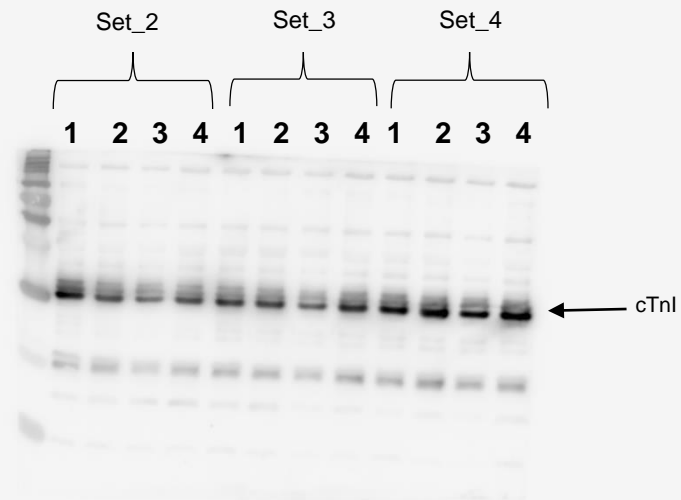

**Left ventricle Cardiac Troponin I original membranes Ser-22/23-P-Blot stain**

1. Lean
2. Lean+Vard
3. ZDF
4. ZDF+Vard

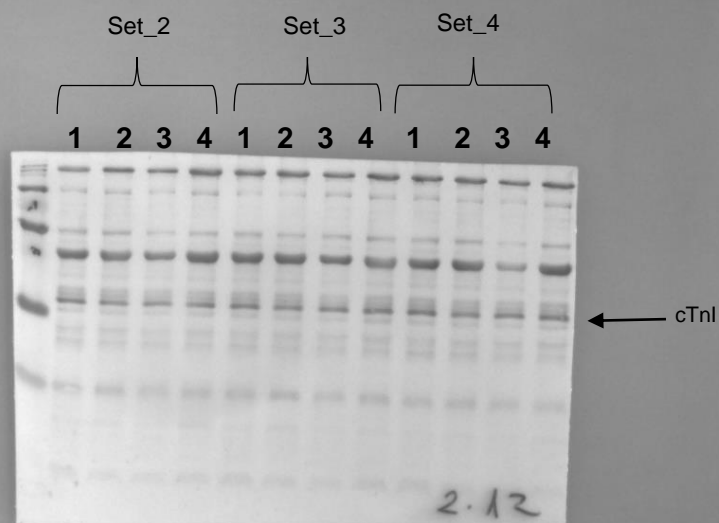



**Left ventricle Cardiac Troponin I original membranes Ser-22/23-P**

1. Lean
2. Lean+Vard
3. ZDF
4. ZDF+Vard

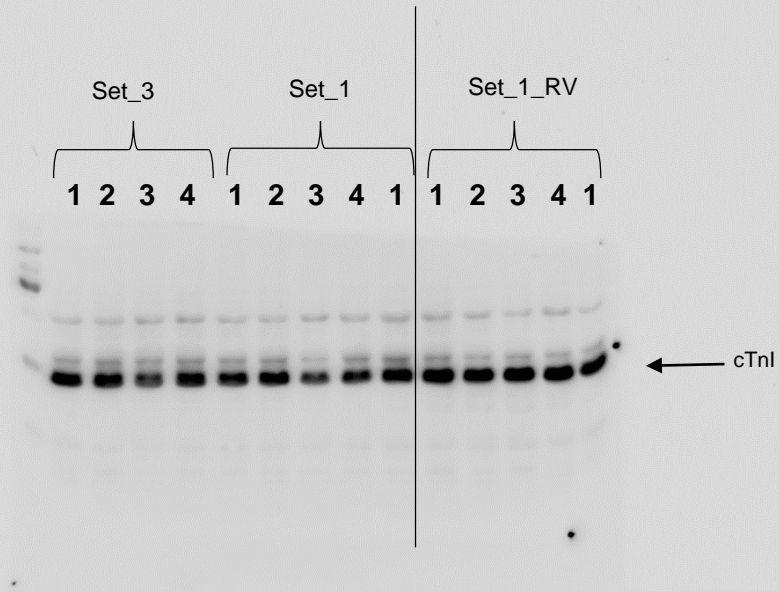

**Left ventricle Cardiac Troponin I original membranes Ser-22/23-P-Blot stain**

1. Lean
2. Lean+Vard
3. ZDF
4. ZDF+Vard

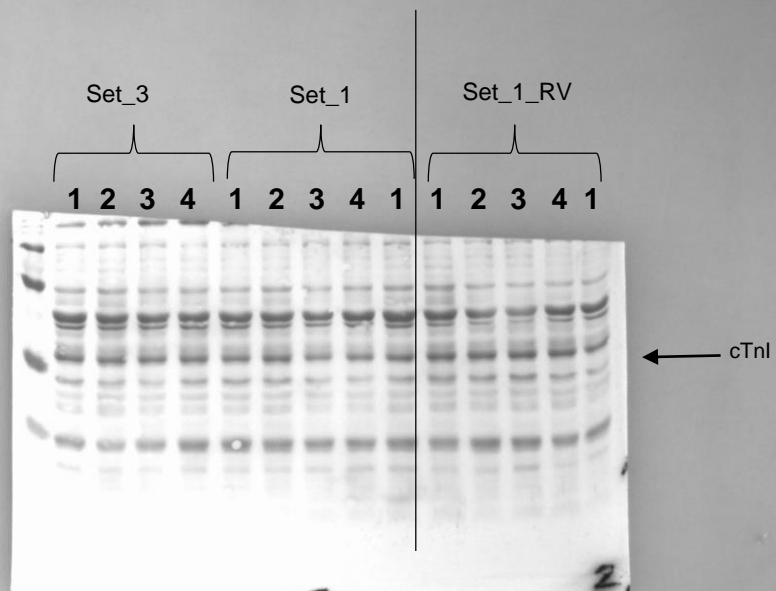

# Left ventricle Cardiac Troponin I original membranes Ser-22/23-P

1. Lean
2. Lean+Vard
3. ZDF
4. ZDF+Vard

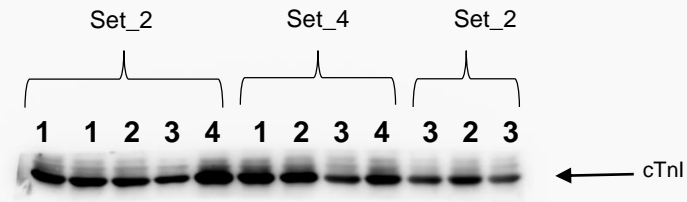

Left ventricle Cardiac Troponin I original membranes Ser-22/23-P-Blot stain

1. Lean
2. Lean+Vard
3. ZDF
4. ZDF+Vard

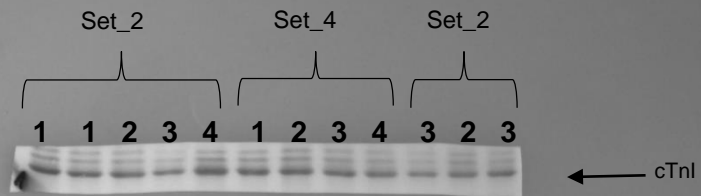

# Left ventricle Cardiac Troponin I original membranes Ser-43-P

1. Lean
2. Lean+Vard
3. ZDF
4. ZDF+Vard

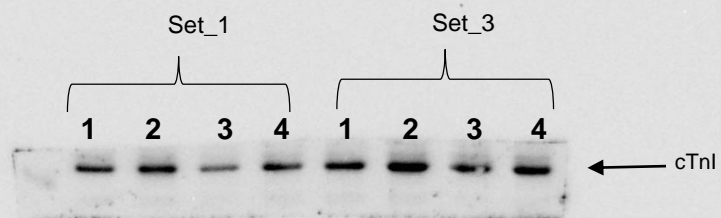

Left ventricle Cardiac Troponin I original membranes Ser-43-P-Blot stain

- 1. Lean
- 2. Lean+Vard
- 3. ZDF
- 4. ZDF+Vard

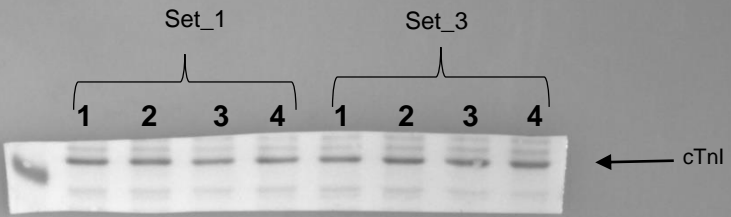

# Left ventricle Cardiac Troponin I original membranes Ser-43-P

1. Lean
2. Lean+Vard
3. ZDF
4. ZDF+Vard

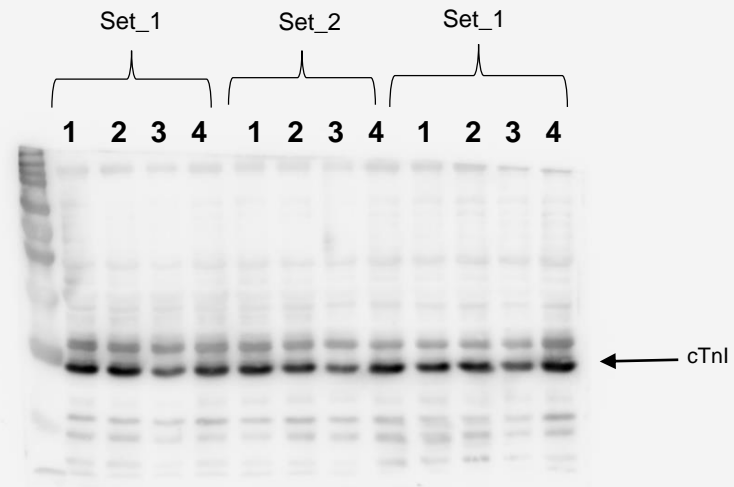

Left ventricle Cardiac Troponin I original membranes Ser-43-P-Blot stain

1. Lean
2. Lean+Vard
3. ZDF
4. ZDF+Vard

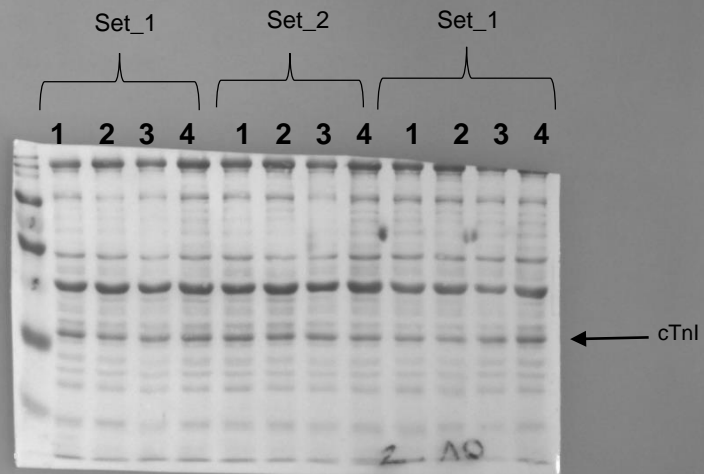



# Left ventricle\_Cardiac Troponin I\_original membranes\_Ser-43-P

1. Lean
2. Lean+Vard
3. ZDF
4. ZDF+Vard

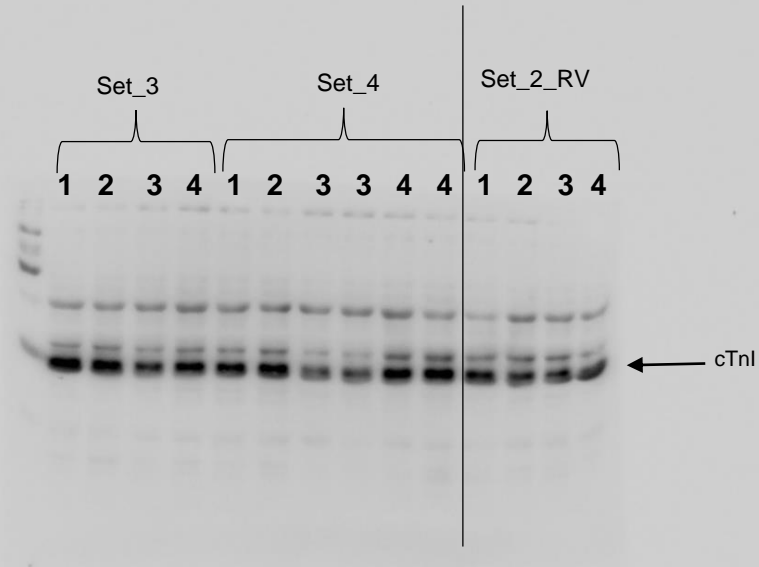

**Left ventricle Cardiac Troponin I original membranes Ser-43-P-Blot stain**

1. Lean
2. Lean+Vard
3. ZDF
4. ZDF+Vard

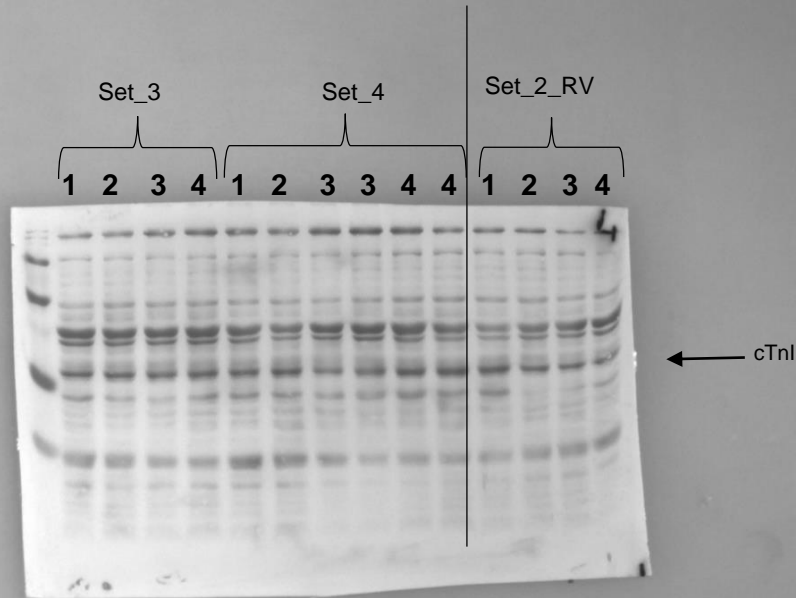

## Left ventricle Cardiac Troponin I original membranes Ser-43-P

1. Lean
2. Lean+Vard
3. ZDF
4. ZDF+Vard

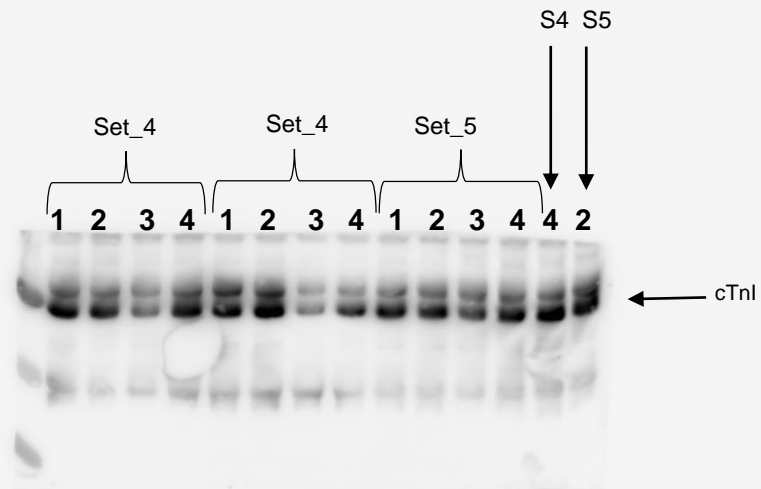

# Left ventricle Cardiac Troponin I original membranes Ser-43-P-Blot stain

1. Lean
2. Lean+Vard
3. ZDF
4. ZDF+Vard

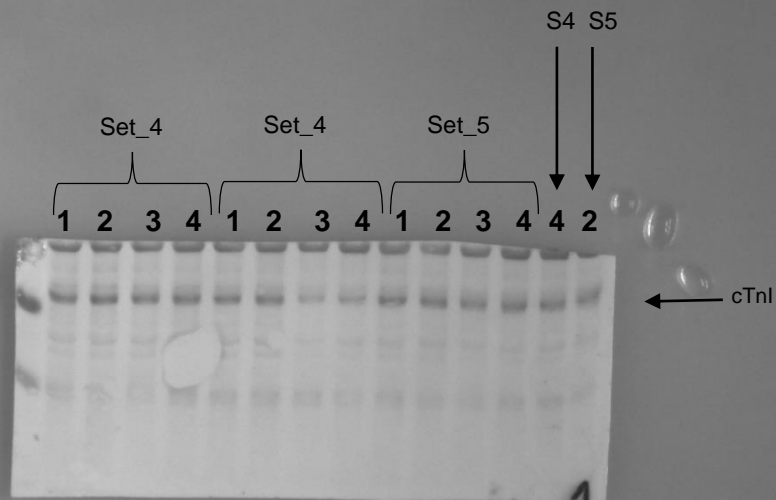

# Left ventricle Cardiac Troponin I original membranes Ser-43-P

1. Lean
2. Lean+Vard
3. ZDF
4. ZDF+Vard

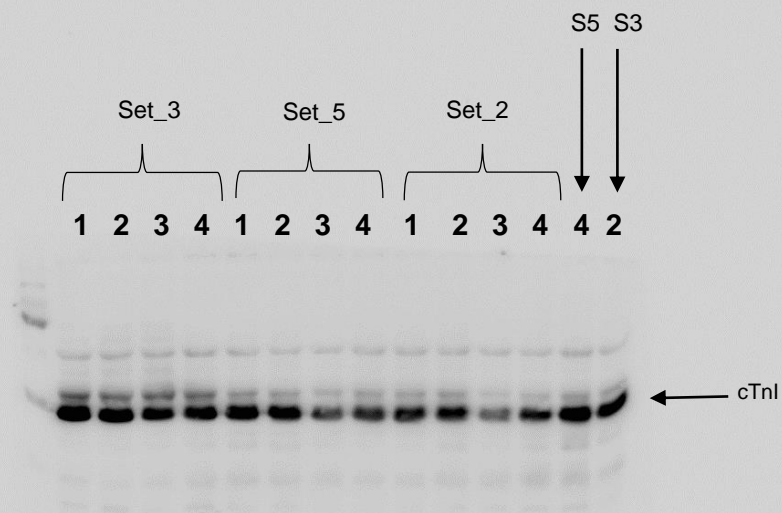

**Left ventricle Cardiac Troponin I original membranes Ser-43-P-Blot stain**

1. Lean
2. Lean+Vard
3. ZDF
4. ZDF+Vard

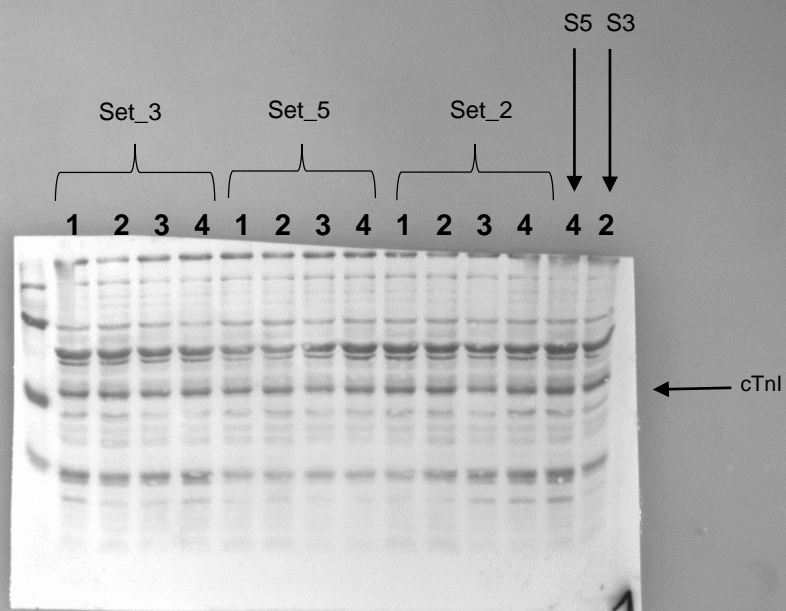

# Left ventricle\_Cardiac Troponin I\_original membranes\_Thr-144-P

1. Lean
2. Lean+Vard
3. ZDF
4. ZDF+Vard

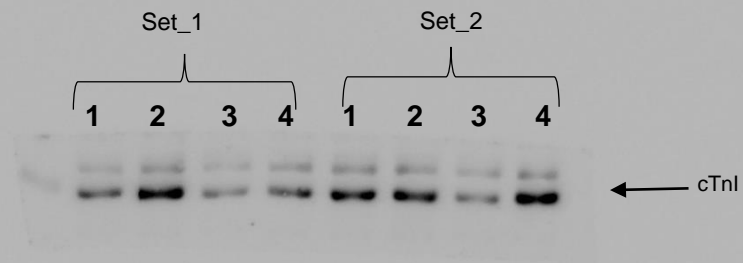

Left ventricle\_Cardiac Troponin I\_original membranes\_Thr-144-P-Blot stain

1. Lean
2. Lean+Vard
3. ZDF
4. ZDF+Vard

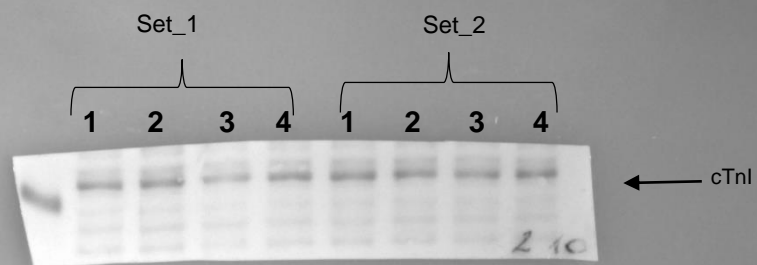



# Left ventricle\_Cardiac Troponin I\_original membranes\_Thr-144-P

1. Lean
2. Lean+Vard
3. ZDF
4. ZDF+Vard

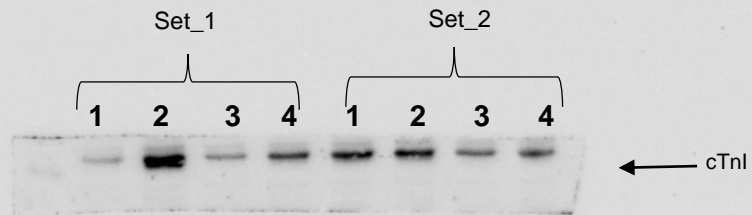

Left ventricle\_Cardiac Troponin I\_original membranes\_Thr-144-P-Blot stain

1. Lean
2. Lean+Vard
3. ZDF
4. ZDF+Vard

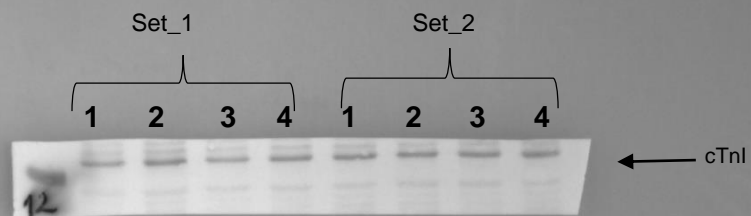

# Left ventricle\_Cardiac Troponin I\_original membranes\_Thr-144-P

1. Lean
2. Lean+Vard
3. ZDF
4. ZDF+Vard

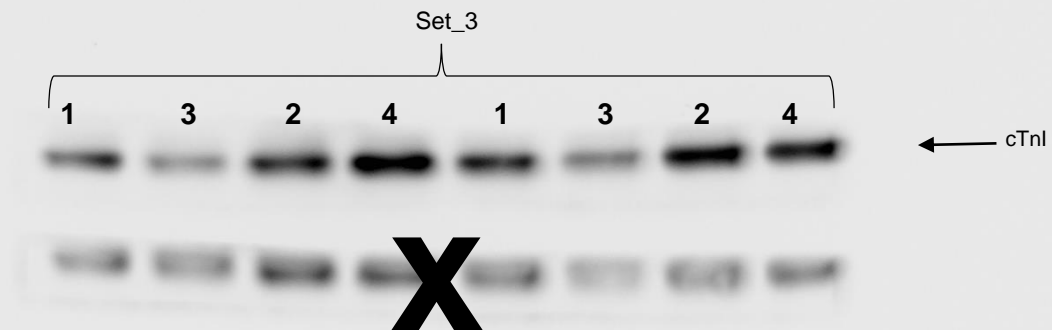

Left ventricle\_Cardiac Troponin I\_original membranes\_Thr-144-P-Blot stain

1. Lean
2. Lean+Vard
3. ZDF
4. ZDF+Vard

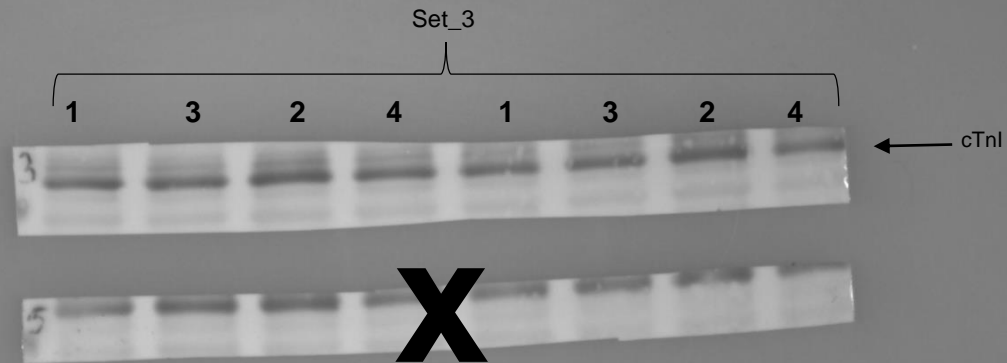

# Left ventricle\_Cardiac Troponin I\_original membranes\_Thr-144-P

1. Lean
2. Lean+Vard
3. ZDF
4. ZDF+Vard

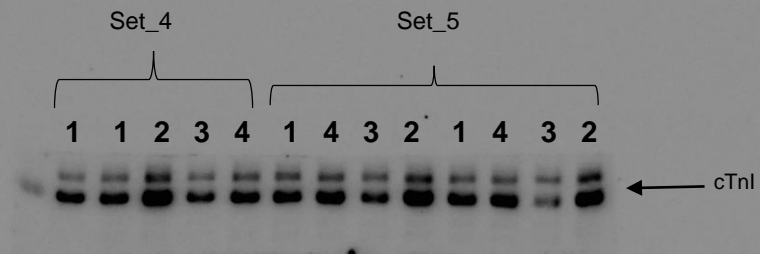

Left ventricle\_Cardiac Troponin I\_original membranes\_Thr-144-P-Blot stain

1. Lean
2. Lean+Vard
3. ZDF
4. ZDF+Vard

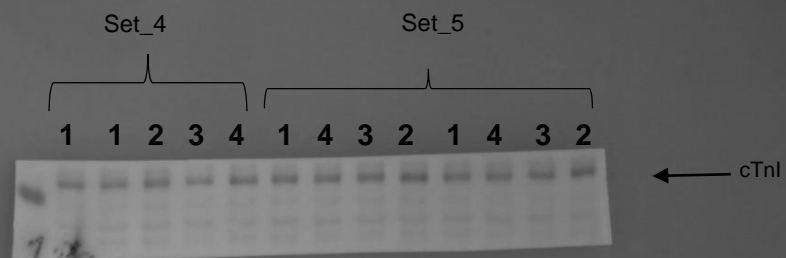

# Left ventricle\_Cardiac Troponin I\_original membranes\_Thr-144-P

1. Lean
2. Lean+Vard
3. ZDF
4. ZDF+Vard

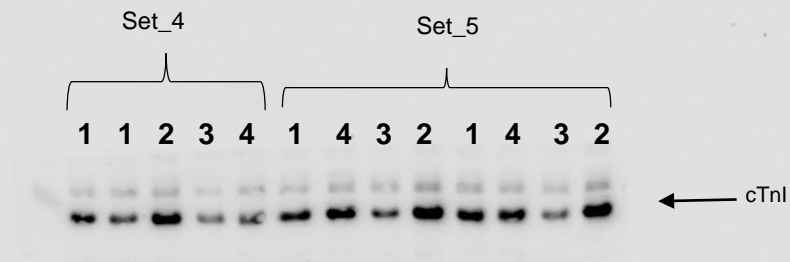

Left ventricle\_Cardiac Troponin I\_original membranes\_Thr-144-Blot stain

1. Lean
2. Lean+Vard
3. ZDF
4. ZDF+Vard

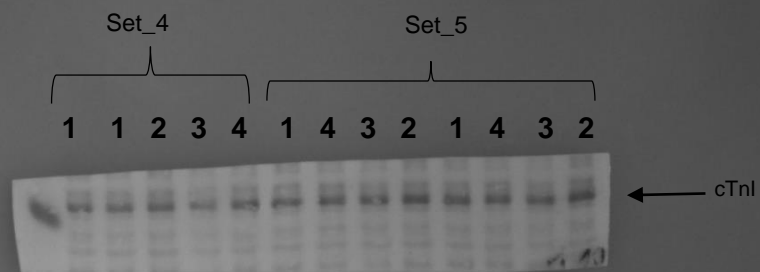



Left ventricle Cardiac myosin binding protein C original membranes Ser-282-P

- 1. Lean
- 2. Lean+Vard
- 3. ZDF
- 4. ZDF+Vard

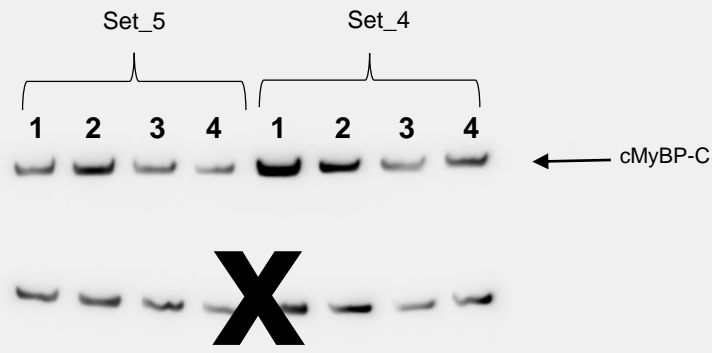

Left ventricle Cardiac myosin binding protein C original membranes Ser-282-P-Blot stain

- 1. Lean
- 2. Lean+Vard
- 3. ZDF
- 4. ZDF+Vard

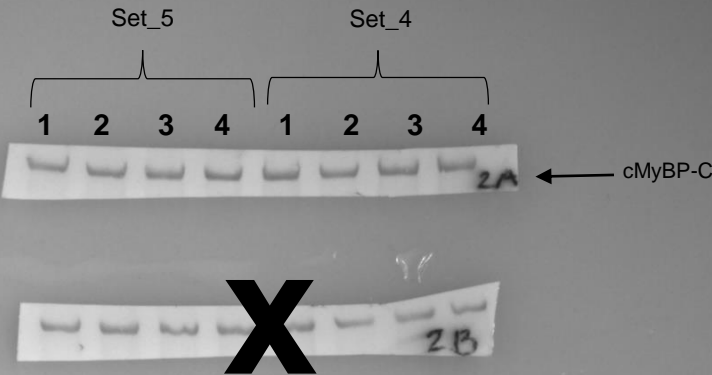

**Left ventricle Cardiac myosin binding protein C original membranes Ser-282-P**

- 1. Lean
- 2. Lean+Vard
- 3. ZDF
- 4. ZDF+Vard

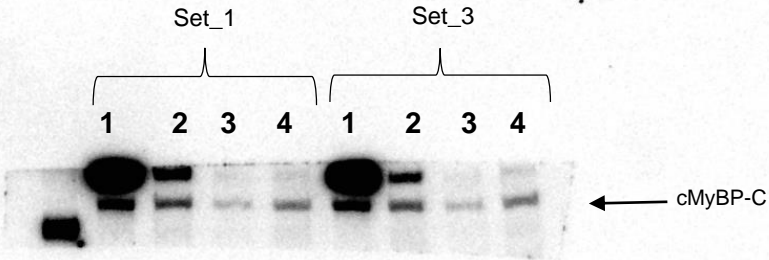

**Left ventricle Cardiac myosin binding protein C original membranes Ser-282-P-Blot stain**

1. Lean
2. Lean+Vard
3. ZDF
4. ZDF+Vard

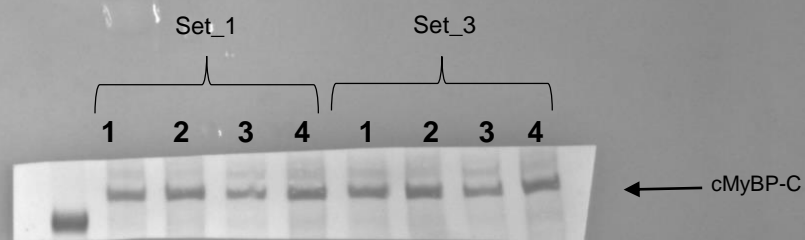

# Left ventricle Cardiac myosin binding protein C original membranes Ser-282-P

1. Lean
2. Lean+Vard
3. ZDF
4. ZDF+Vard

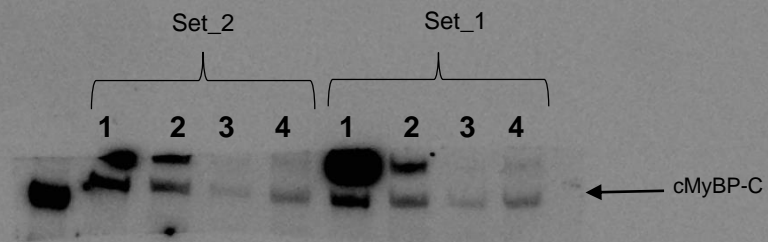

**Left ventricle Cardiac myosin binding protein C original membranes Ser-282-P-Blot stain**

1. Lean
2. Lean+Vard
3. ZDF
4. ZDF+Vard

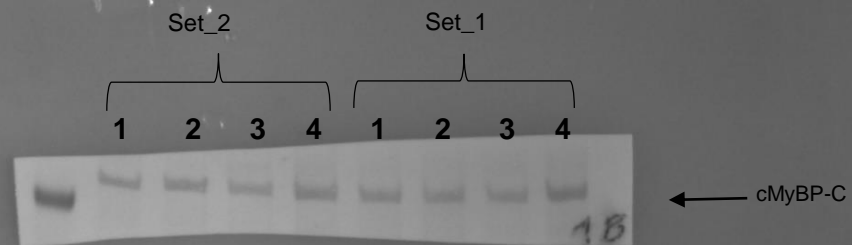

**Left ventricle Cardiac myosin binding protein C original membranes Ser-282-P**

- 1. Lean
- 2. Lean+Vard
- 3. ZDF
- 4. ZDF+Vard

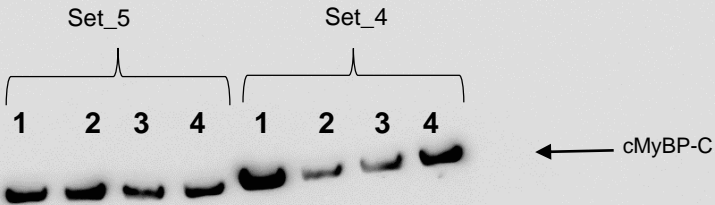

Left ventricle Cardiac myosin binding protein C original membranes Ser-282-P-Blot stain

- 1. Lean
- 2. Lean+Vard
- 3. ZDF
- 4. ZDF+Vard

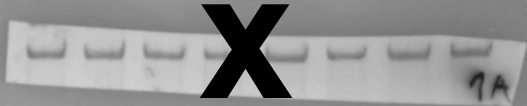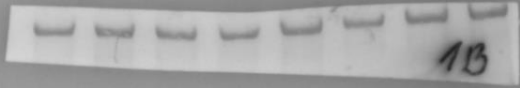

← cMyBP-C

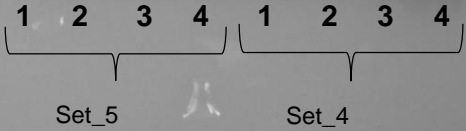



Left ventricle Cardiac myosin binding protein C original membranes Ser-282-P

- 1. Lean
- 2. Lean+Vard
- 3. ZDF
- 4. ZDF+Vard

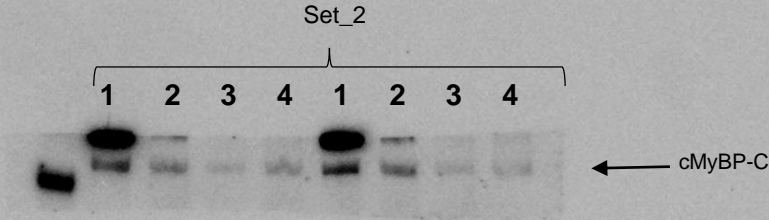

Left ventricle Cardiac myosin binding protein C original membranes Ser-282-P- Blot stain

- 1. Lean
- 2. Lean+Vard
- 3. ZDF
- 4. ZDF+Vard

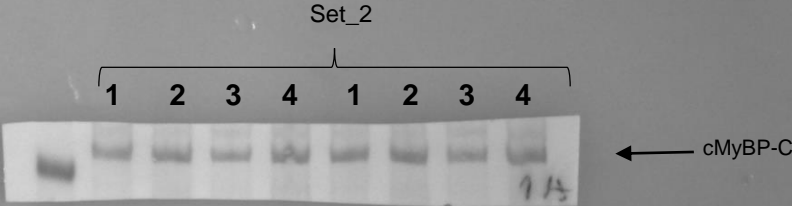

**Left ventricle Titin-P original gel**

- 1. Lean
- 2. Lean+Vard
- 3. ZDF
- 4. ZDF+Vard

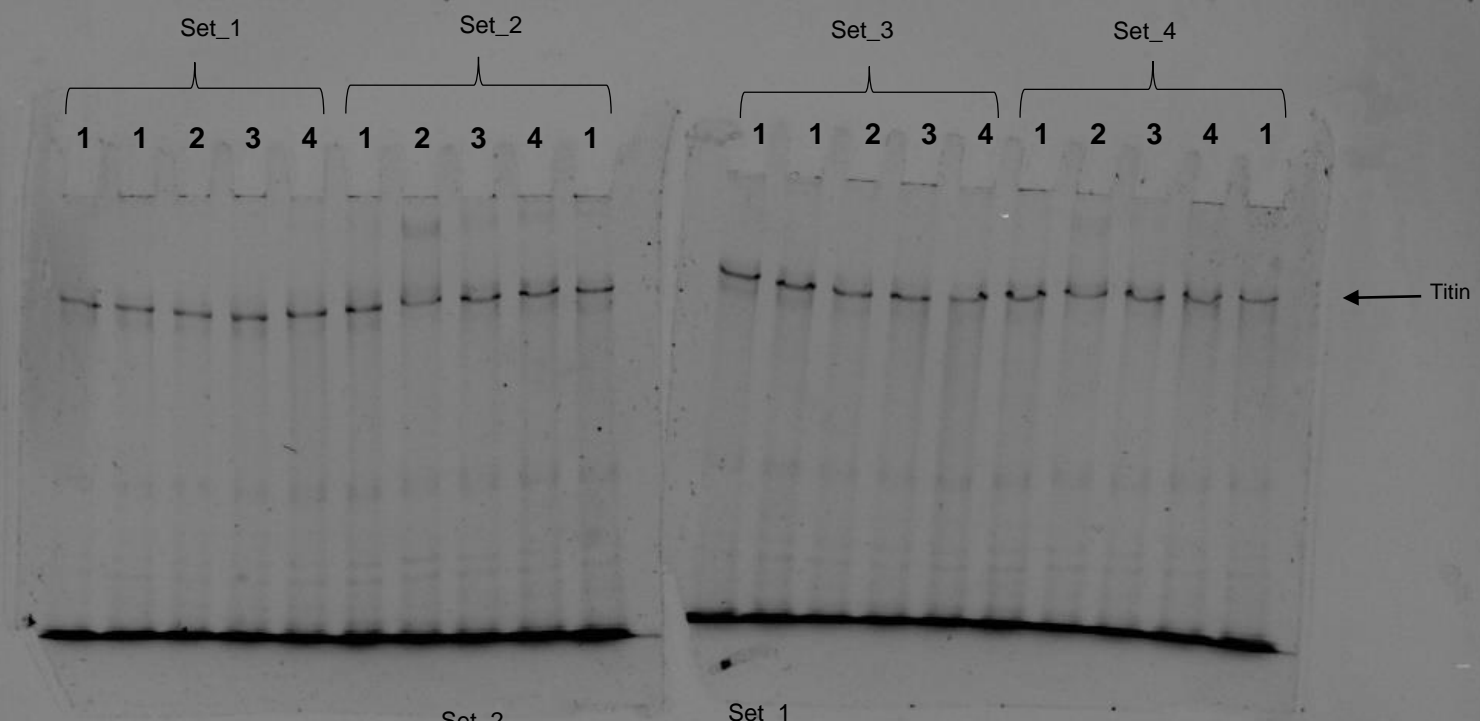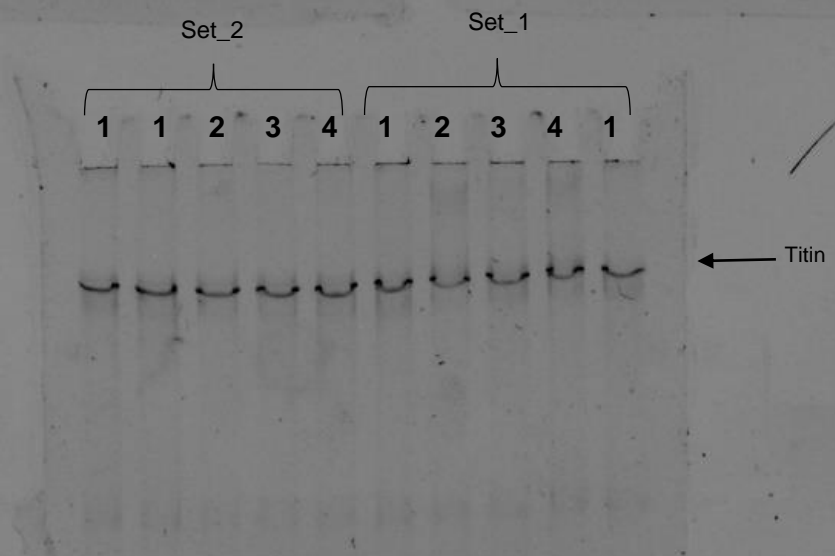

**Left ventricle Titin-total protein original gel**

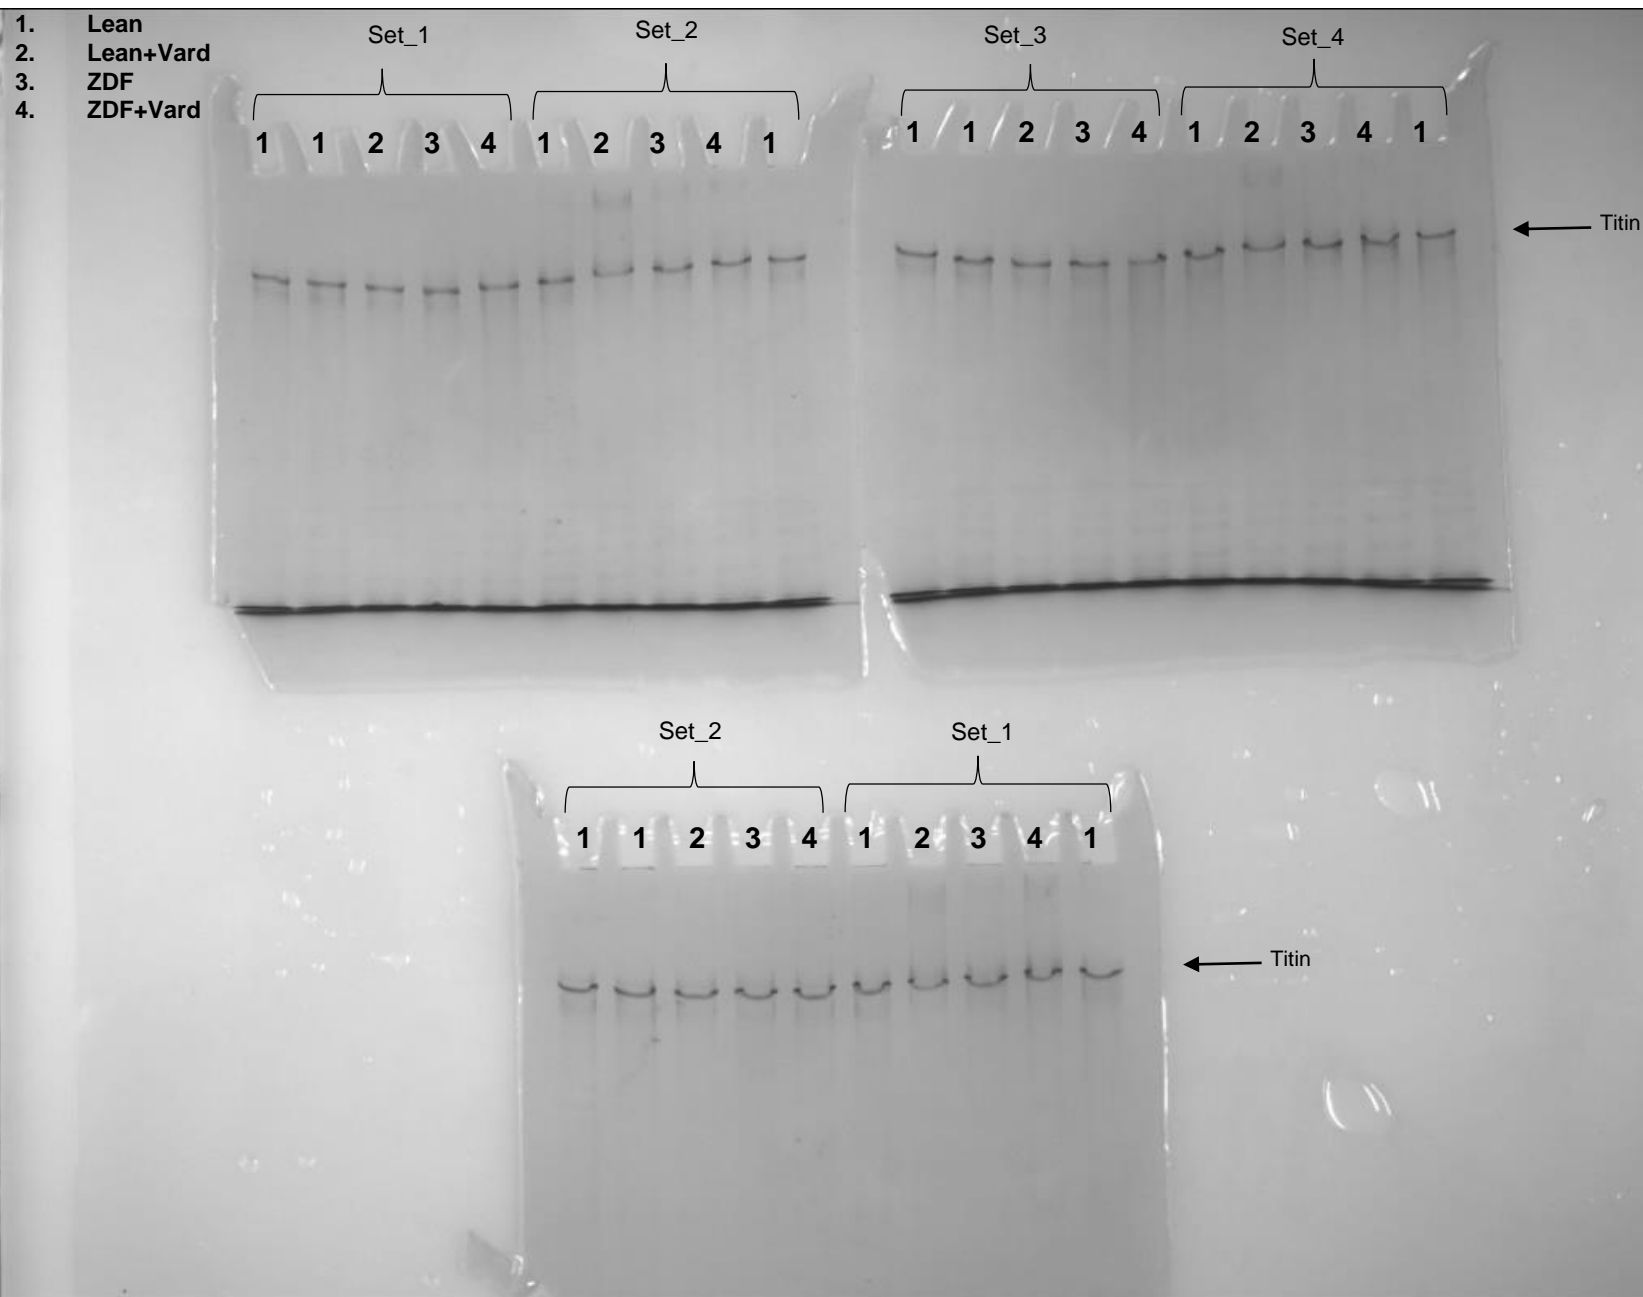

# Left ventricle Titin-P original gel

1. Lean
2. Lean+Vard
3. ZDF
4. ZDF+Vard

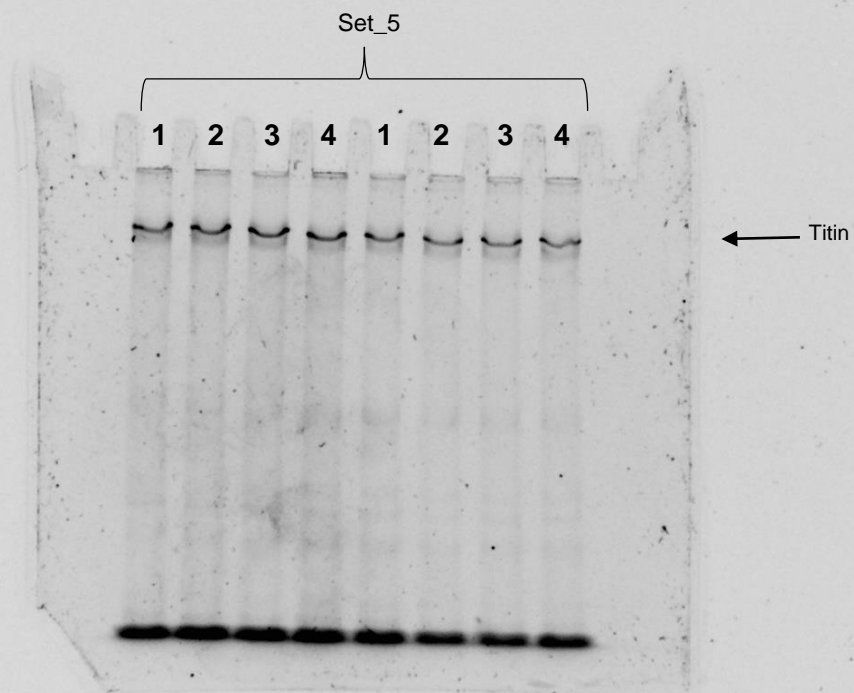

# Left ventricle Titin-total protein original gel

1. Lean
2. Lean+Vard
3. ZDF
4. ZDF+Vard

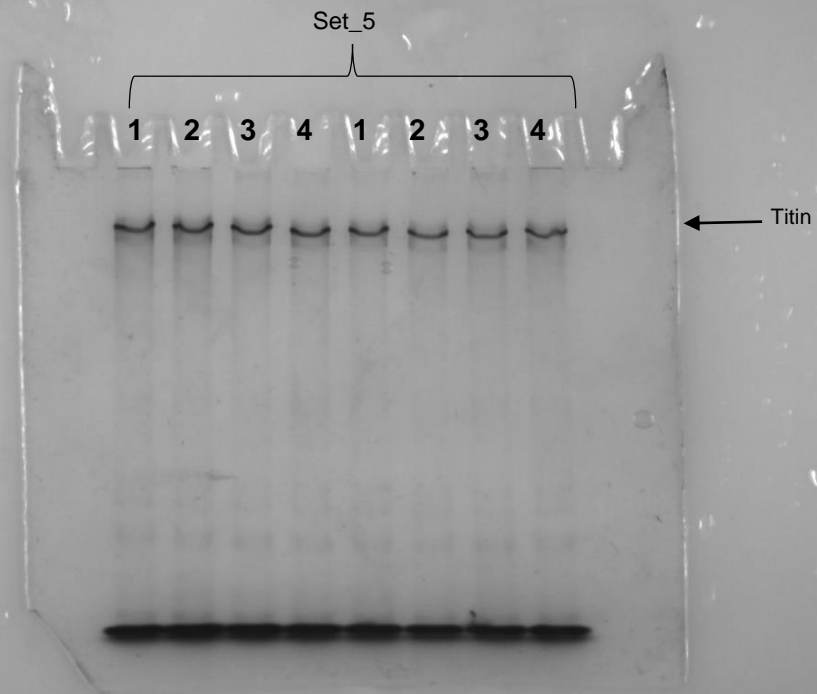

**Left ventricle Titin-P original gel**

- 1. Lean
- 2. Lean+Vard
- 3. ZDF
- 4. ZDF+Vard

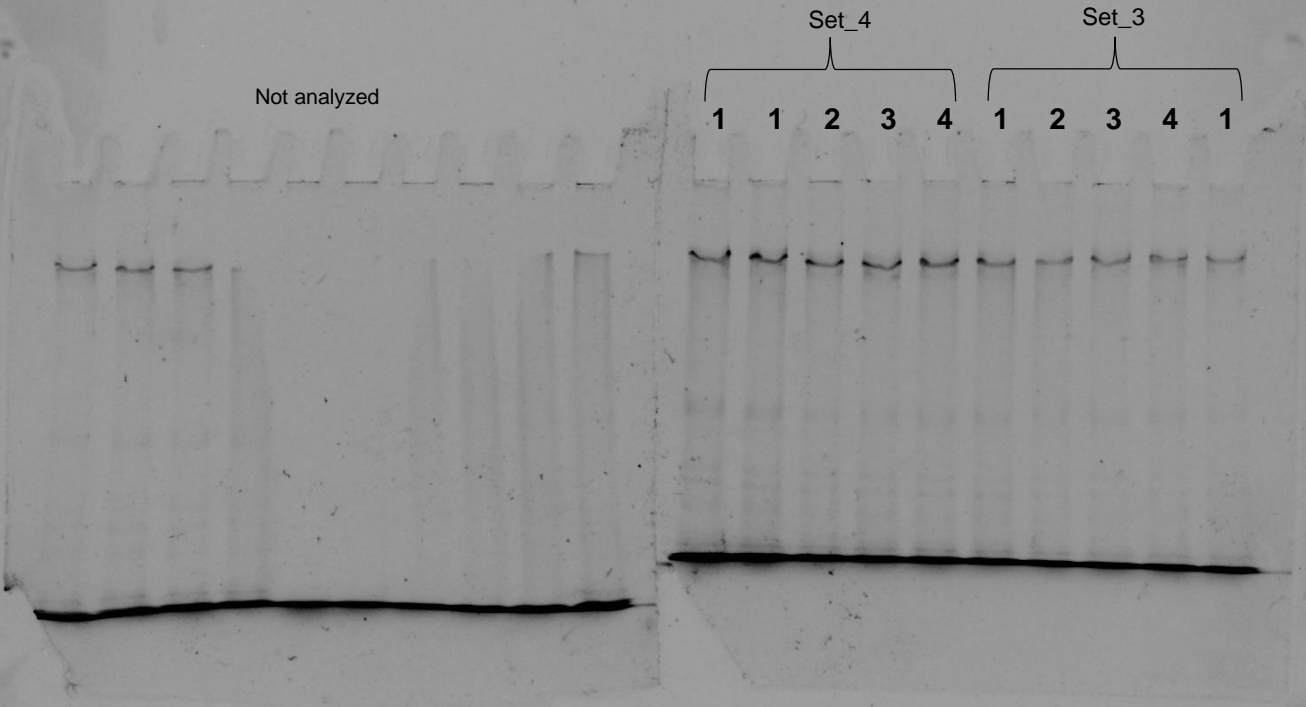

Left ventricle Titin-total protein original gel

- 1. Lean
- 2. Lean+Vard
- 3. ZDF
- 4. ZDF+Vard

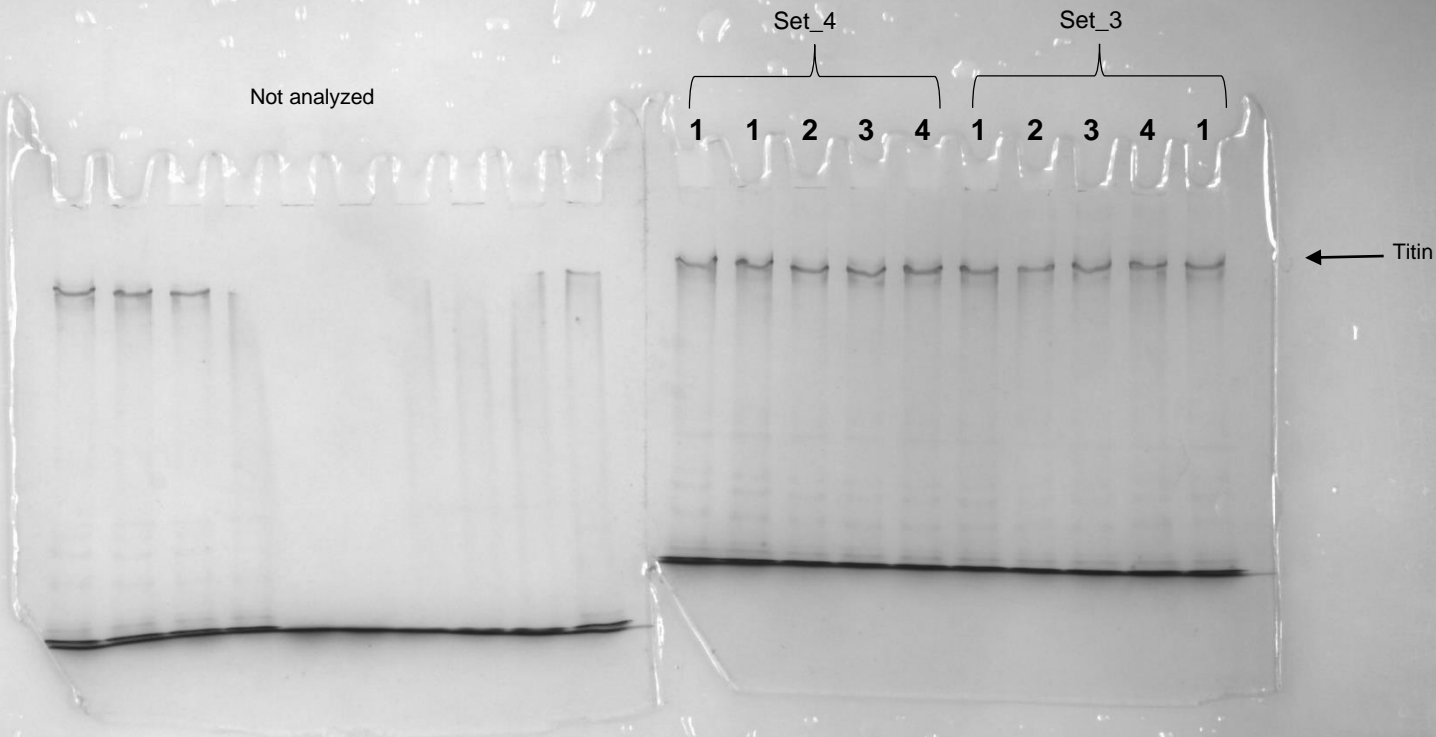



## Right ventricle Cardiac Troponin I original membranes Ser-22/23-P

1. Lean
2. Lean+Vard
3. ZDF
4. ZDF+Vard

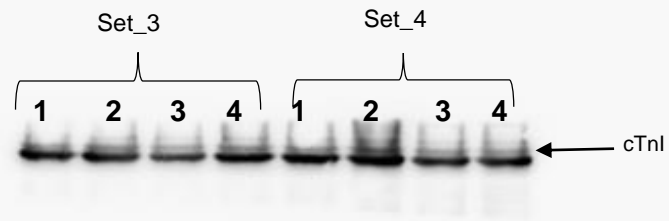

**Right ventricle Cardiac Troponin I original membranes Ser-22/23-Blot stain**

1. Lean
2. Lean+Vard
3. ZDF
4. ZDF+Vard

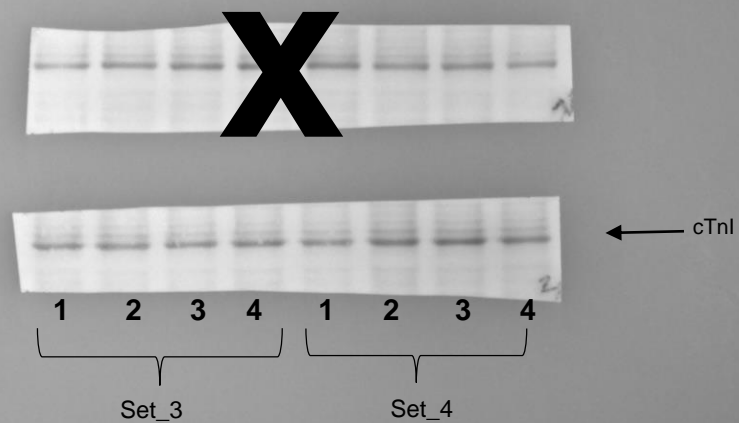

## Right ventricle Cardiac Troponin I original membranes Ser-22/23

1. Lean
2. Lean+Vard
3. ZDF
4. ZDF+Vard

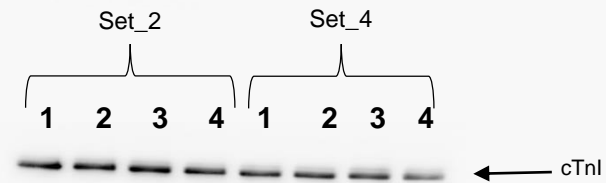

Right ventricle Cardiac Troponin I original membranes Ser-22/23-Blot stain

1. Lean
2. Lean+Vard
3. ZDF
4. ZDF+Vard

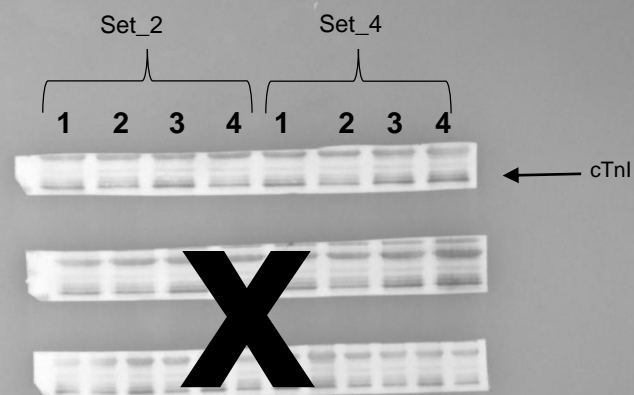

## Right ventricle Cardiac Troponin I original membranes Ser-22/23-P

1. Lean
2. Lean+Vard
3. ZDF
4. ZDF+Vard

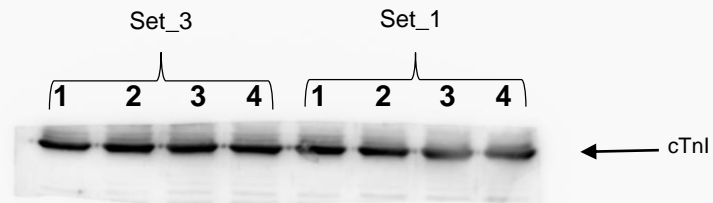

**Right ventricle Cardiac Troponin I original membranes Ser-22/23-P-Blot stain**

1. Lean
2. Lean+Vard
3. ZDF
4. ZDF+Vard

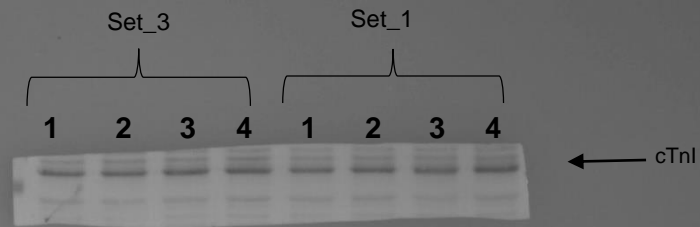

# Right ventricle Cardiac Troponin I original membranes Ser-22/23-P

1. Lean
2. Lean+Vard
3. ZDF
4. ZDF+Vard

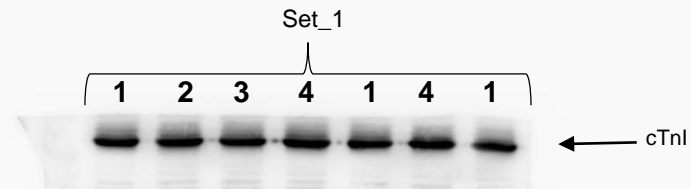

Right ventricle\_Cardiac Troponin I\_original membranes\_Ser-22/23-P-Blot stain

1. Lean
2. Lean+Vard
3. ZDF
4. ZDF+Vard

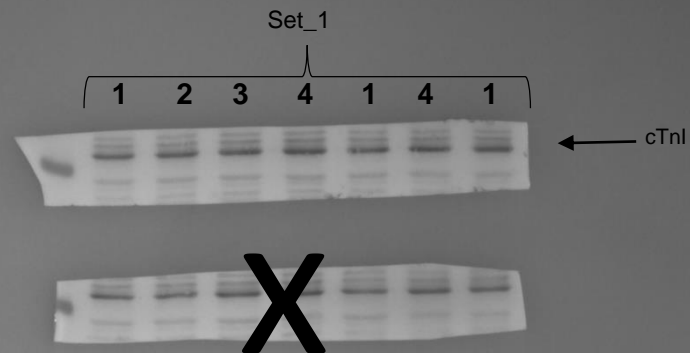



# Right ventricle Cardiac Troponin I original membranes Ser-22/23-P

1. Lean
2. Lean+Vard
3. ZDF
4. ZDF+Vard

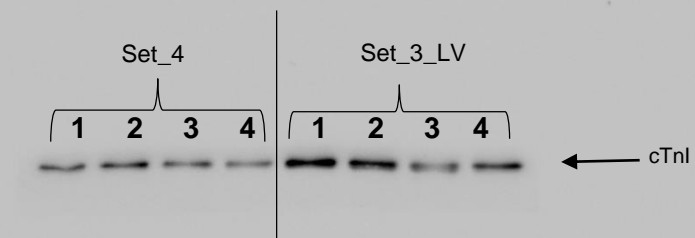

Right ventricle Cardiac Troponin I original membranes Ser-22/23-P-Blot stain

1. Lean
2. Lean+Vard
3. ZDF
4. ZDF+Vard

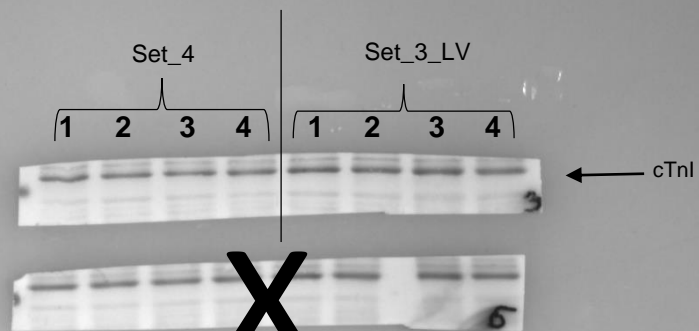

# Right ventricle Cardiac Troponin I original membranes Ser-22/23-P-

1. Lean
2. Lean+Vard
3. ZDF
4. ZDF+Vard

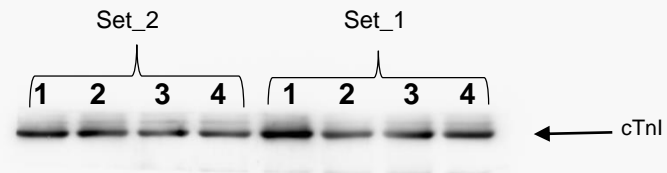

**Right ventricle Cardiac Troponin I original membranes Ser-22/23-P-Blot stain**

1. Lean
2. Lean+Vard
3. ZDF
4. ZDF+Vard

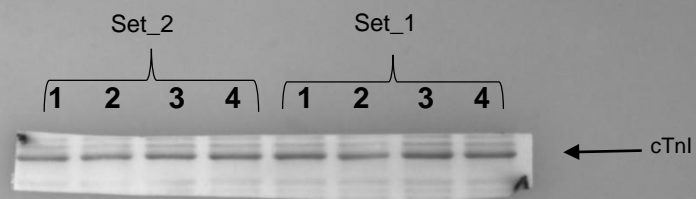

## Right ventricle Cardiac Troponin I original membranes Ser-43-P

1. Lean
2. Lean+Vard
3. ZDF
4. ZDF+Vard

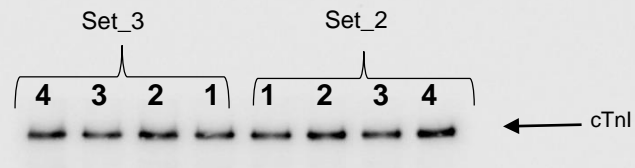

# Right ventricle Cardiac Troponin I original membranes Ser-43-P-Blot stain

1. Lean
2. Lean+Vard
3. ZDF
4. ZDF+Vard

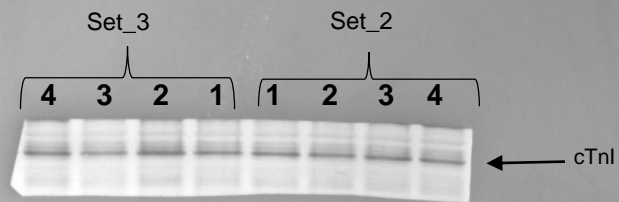

## Right ventricle Cardiac Troponin I original membranes Ser-43-P

1. Lean
2. Lean+Vard
3. ZDF
4. ZDF+Vard

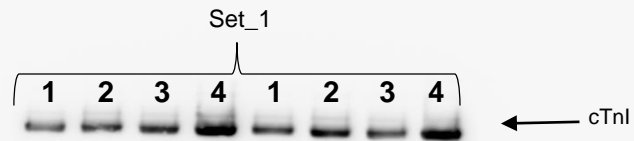

**Right ventricle Cardiac Troponin I original membranes Ser-43-P-Blot stain**

1. Lean
2. Lean+Vard
3. ZDF
4. ZDF+Vard

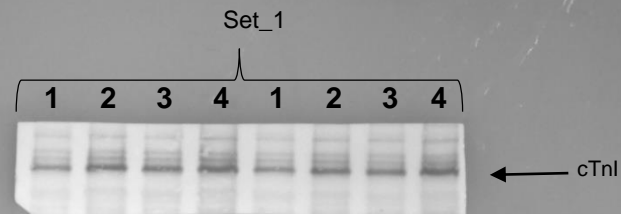



# Right ventricle Cardiac Troponin I original membranes Ser-43-P

1. Lean
2. Lean+Vard
3. ZDF
4. ZDF+Vard

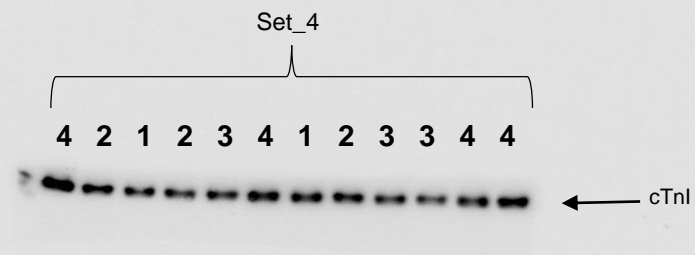

**Right ventricle Cardiac Troponin I original membranes Ser-43-P-Blot stain**

1. Lean
2. Lean+Vard
3. ZDF
4. ZDF+Vard

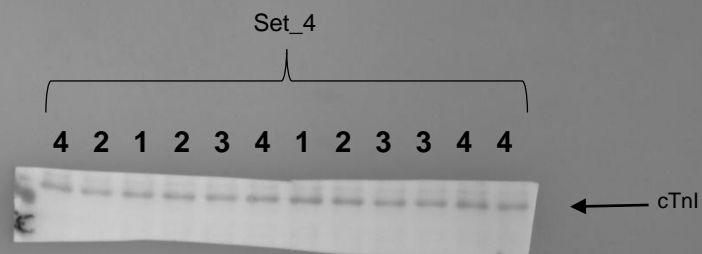

## Right ventricle Cardiac Troponin I original membranes Ser-43-P

1. Lean
2. Lean+Vard
3. ZDF
4. ZDF+Vard

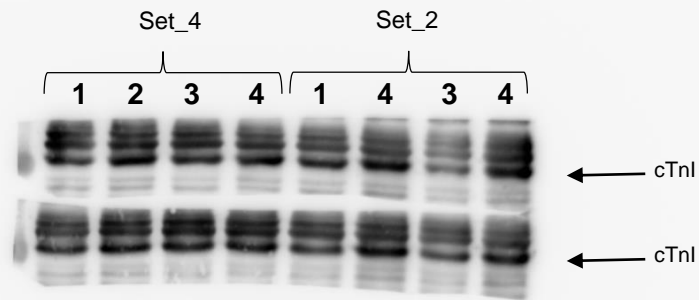

**Right ventricle Cardiac Troponin I original membranes Ser-43-P-Blot stain**

1. Lean
2. Lean+Vard
3. ZDF
4. ZDF+Vard

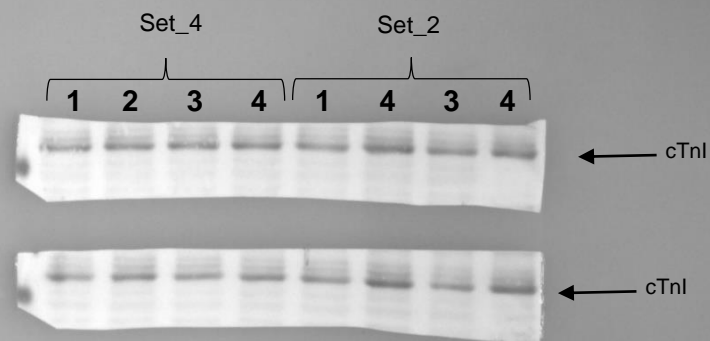

# Right ventricle Cardiac Troponin I original membranes Ser-43-P

1. Lean
2. Lean+Vard
3. ZDF
4. ZDF+Vard

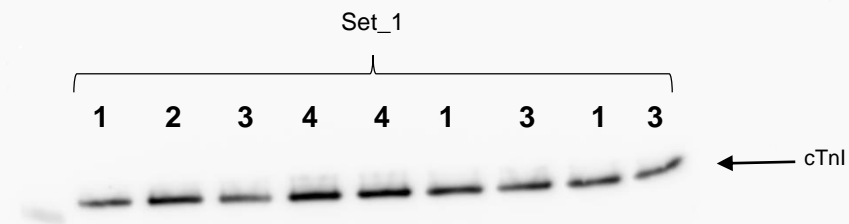

# Right ventricle Cardiac Troponin I original membranes Ser-43-P-Blot stain

1. Lean
2. Lean+Vard
3. ZDF
4. ZDF+Vard

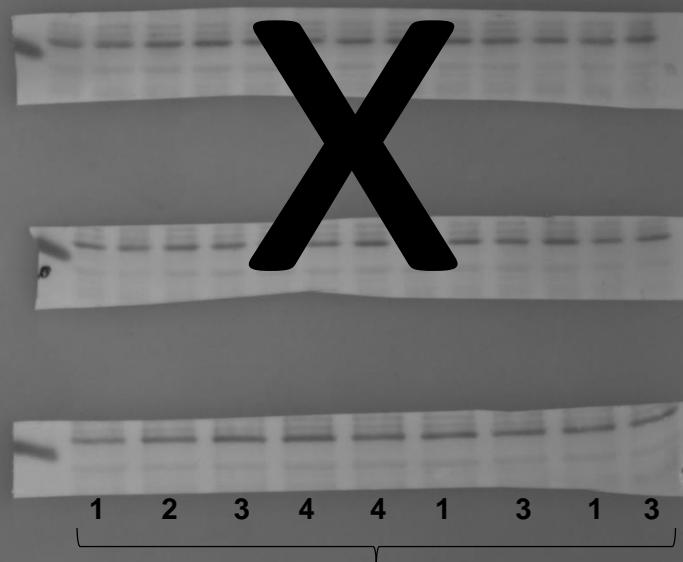

← cTnI

# Right ventricle Cardiac Troponin I original membranes Thr-144-P

1. Lean
2. Lean+Vard
3. ZDF
4. ZDF+Vard

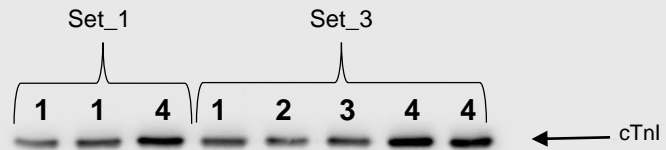

Right ventricle Cardiac Troponin I original membranes Thr-144-P-Blot stain

1. Lean
2. Lean+Vard
3. ZDF
4. ZDF+Vard

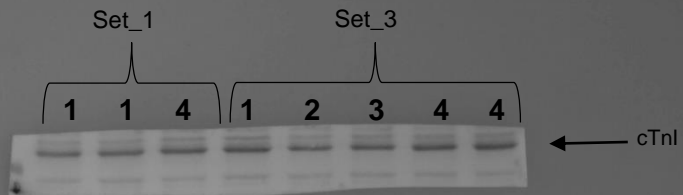



# Right ventricle Cardiac Troponin I original membranes Thr-144-P

1. Lean
2. Lean+Vard
3. ZDF
4. ZDF+Vard

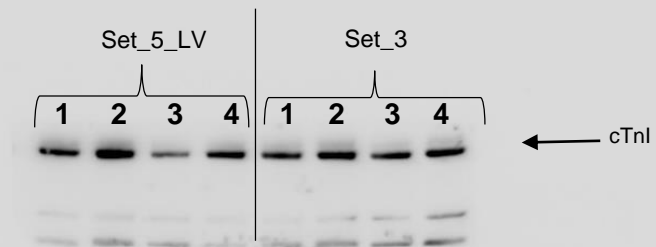

Right ventricle Cardiac Troponin I original membranes Thr-144-P-Blot stain

1. Lean
2. Lean+Vard
3. ZDF
4. ZDF+Vard

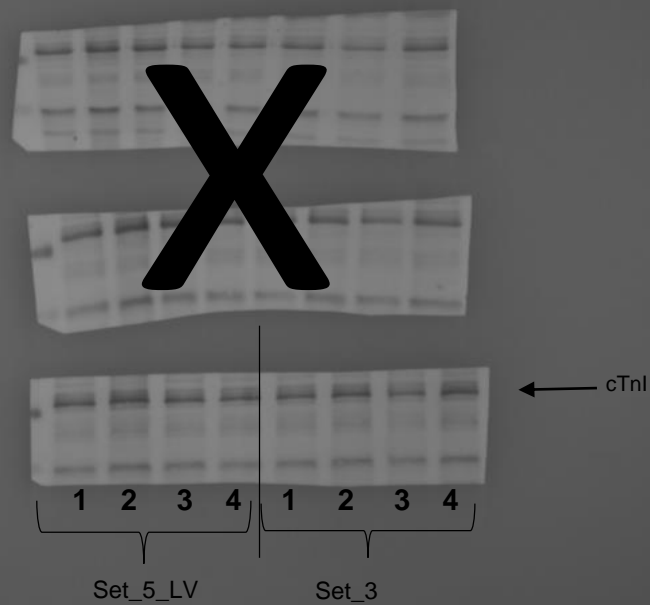

# Right ventricle Cardiac Troponin I original membranes Thr-144-P

1. Lean
2. Lean+Vard
3. ZDF
4. ZDF+Vard

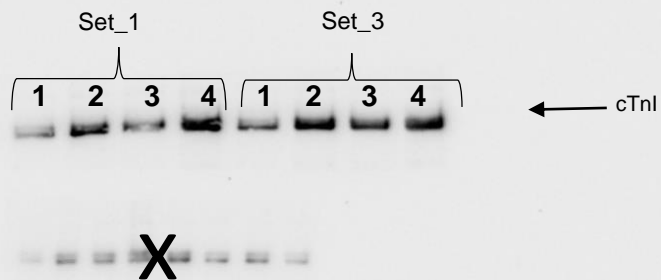

Right ventricle Cardiac Troponin I original membranes Thr-144-P-Blot stain

1. Lean
2. Lean+Vard
3. ZDF
4. ZDF+Vard

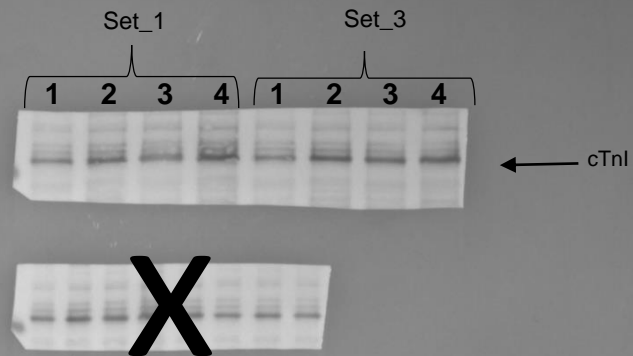

# Right ventricle Cardiac Troponin I original membranes Thr-144-P

1. Lean
2. Lean+Vard
3. ZDF
4. ZDF+Vard

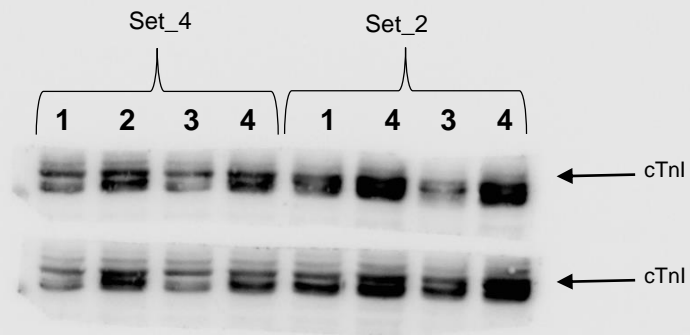

**Right ventricle Cardiac Troponin I original membranes Thr-144-P-Blot stain**

1. Lean
2. Lean+Vard
3. ZDF
4. ZDF+Vard

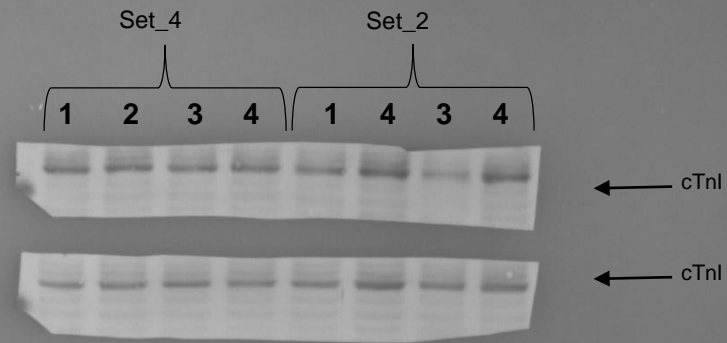

# Right ventricle Cardiac Troponin I original membranes Thr-144-P

1. Lean
2. Lean+Vard
3. ZDF
4. ZDF+Vard

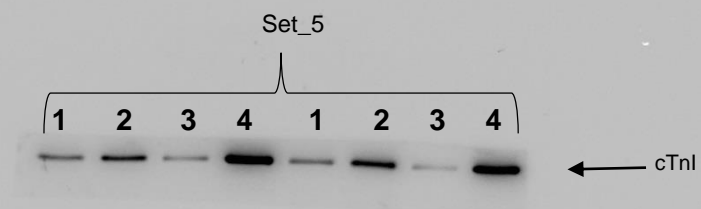

Right ventricle Cardiac Troponin I original membranes Thr-144-P-Blot stain

1. Lean
2. Lean+Vard
3. ZDF
4. ZDF+Vard

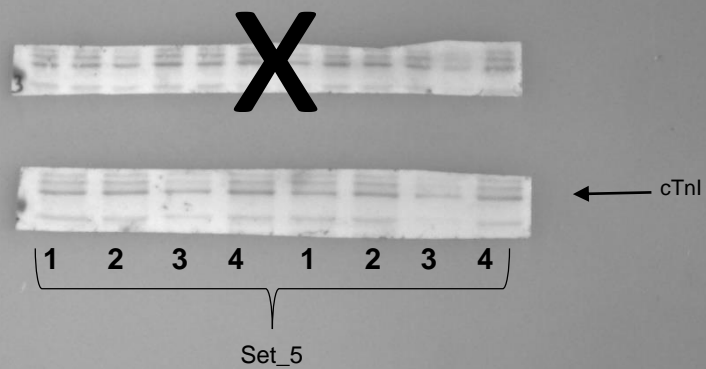



# Right ventricle\_Cardiac Troponin I\_original membranes\_Thr-144-P

1. Lean
2. Lean+Vard
3. ZDF
4. ZDF+Vard

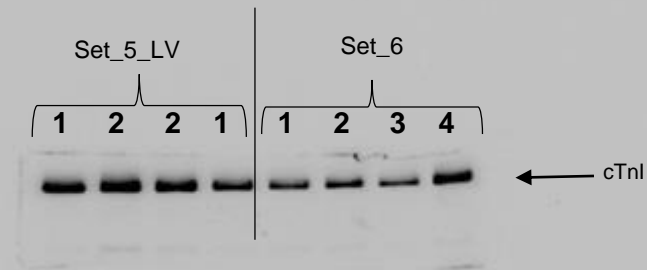

Right ventricle Cardiac Troponin I original membranes Thr-144-P-Blot stain

1. Lean
2. Lean+Vard
3. ZDF
4. ZDF+Vard

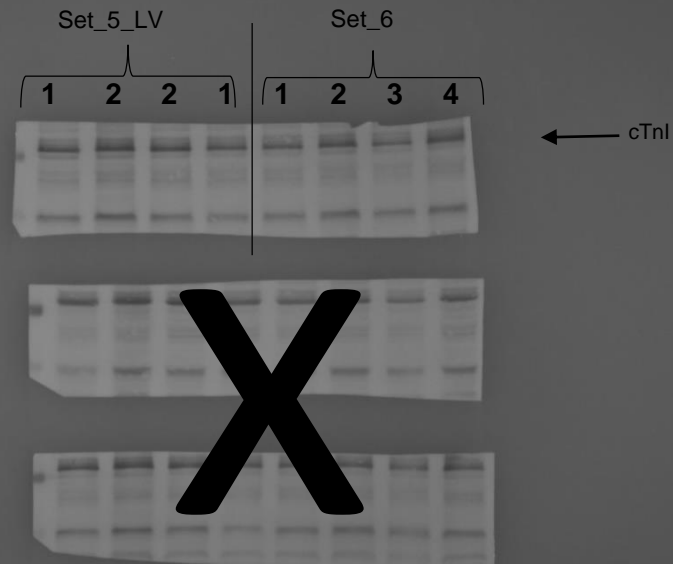

**Right ventricle Cardiac Troponin I original membranes Thr-144-P**

1. Lean
2. Lean+Vard
3. ZDF
4. ZDF+Vard

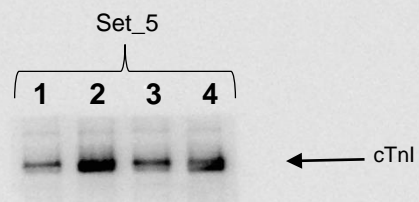

**Right ventricle Cardiac Troponin I original membranes Thr-144-P-Blot stain**

1. Lean
2. Lean+Vard
3. ZDF
4. ZDF+Vard

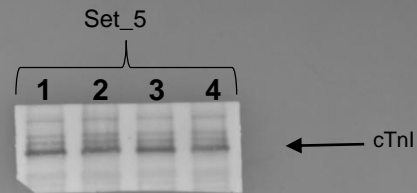

Right ventricle Cardiac myosin binding protein C original membranes Ser-282-P

- 1. Lean
- 2. Lean+Vard
- 3. ZDF
- 4. ZDF+Vard

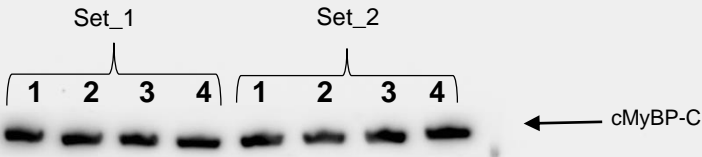

Right ventricle Cardiac myosin binding protein C original membranes Ser-282--Blot stain

- 1. Lean
- 2. Lean+Vard
- 3. ZDF
- 4. ZDF+Vard

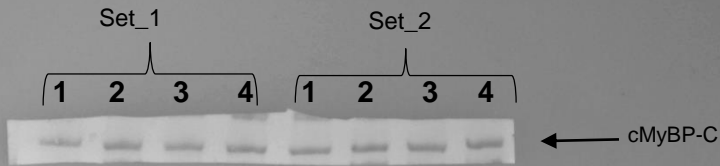

Right ventricle Cardiac myosin binding protein C original membranes Ser-282-P

- 1. Lean
- 2. Lean+Vard
- 3. ZDF
- 4. ZDF+Vard

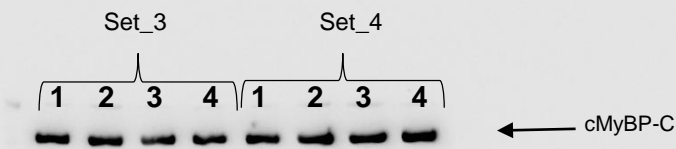

Right ventricle Cardiac myosin binding protein C original membranes Ser-282-P-Blot stain

- 1. Lean
- 2. Lean+Vard
- 3. ZDF
- 4. ZDF+Vard

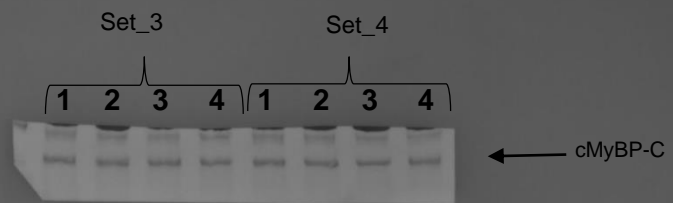



Right ventricle Cardiac myosin binding protein C original membranes Ser-282-P

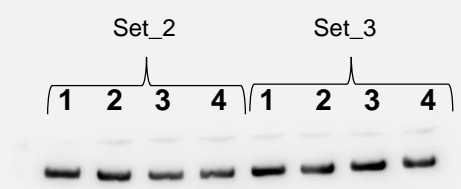

**Right ventricle Cardiac myosin binding protein C original membranes Ser-282-P-Blot stain**

- 1. Lean
- 2. Lean+Vard
- 3. ZDF
- 4. ZDF+Vard

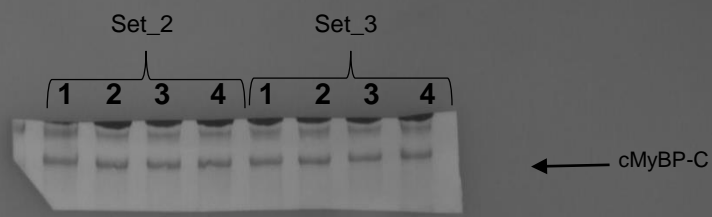

Right ventricle Cardiac myosin binding protein C original membranes Ser-282-P

- 1. Lean
- 2. Lean+Vard
- 3. ZDF
- 4. ZDF+Vard

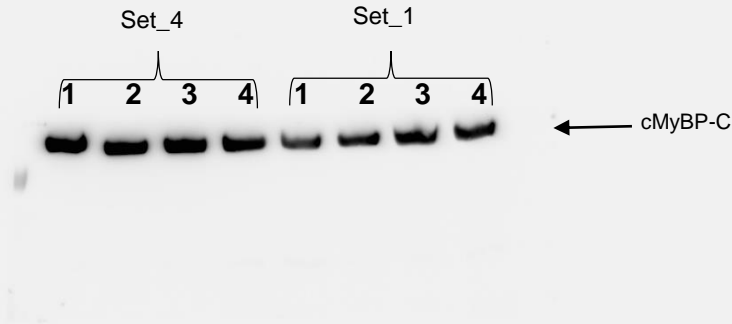

Right ventricle Cardiac myosin binding protein C original membranes Ser-282-P-Blot stain

- 1. Lean
- 2. Lean+Vard
- 3. ZDF
- 4. ZDF+Vard

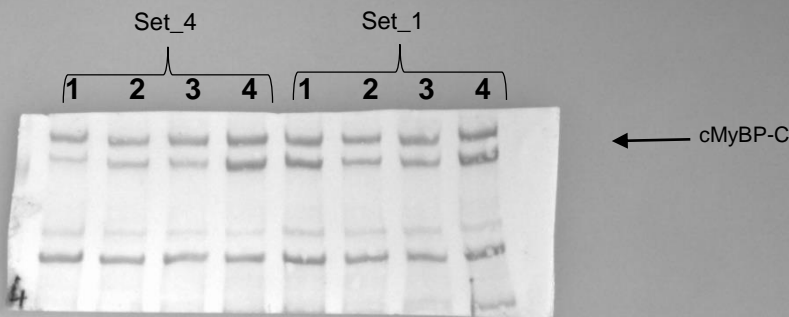

Right ventricle Titin-P original gel

- 1. Lean
- 2. Lean+Vard
- 3. ZDF
- 4. ZDF+Vard

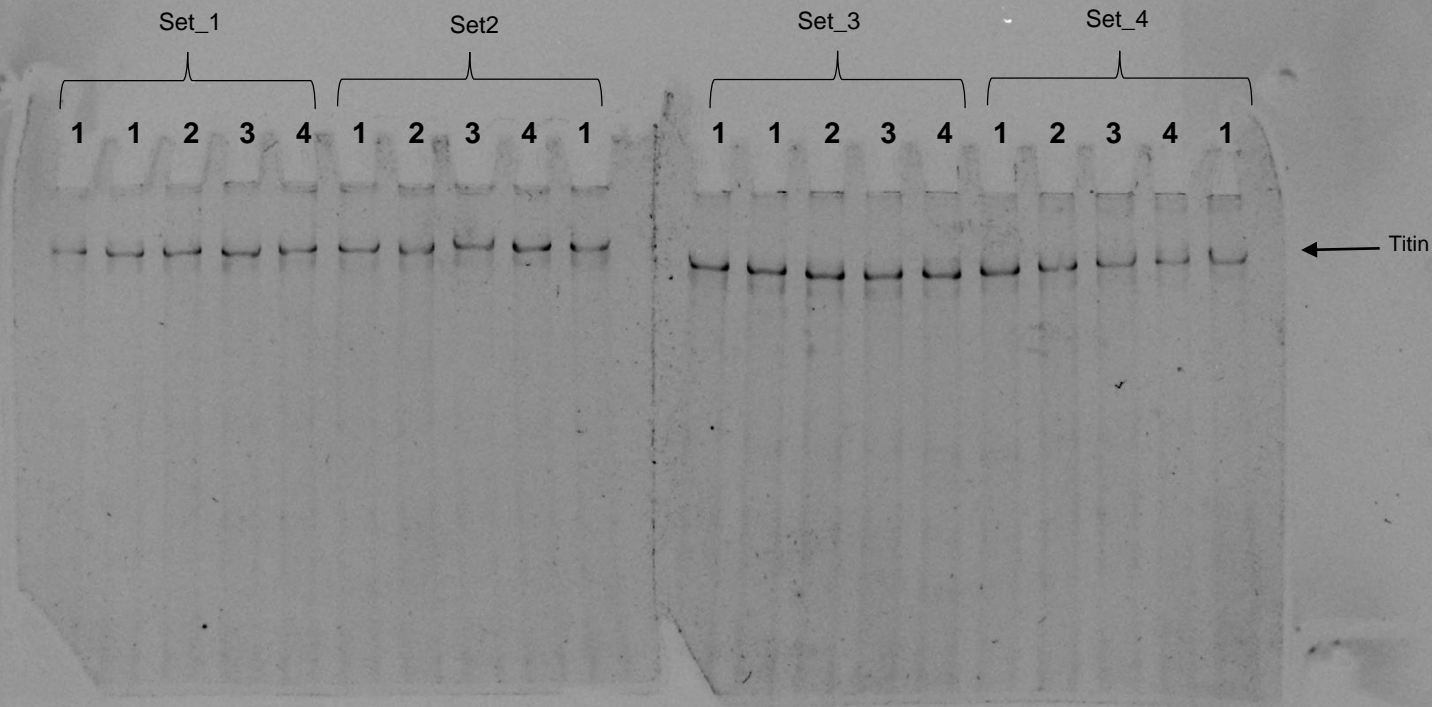

1. Lean
2. Lean+Vard
3. ZDF
4. ZDF+Vard

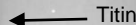

# Right ventricle Titin-P original gel

1. Lean
2. Lean+Vard
3. ZDF
4. ZDF+Vard

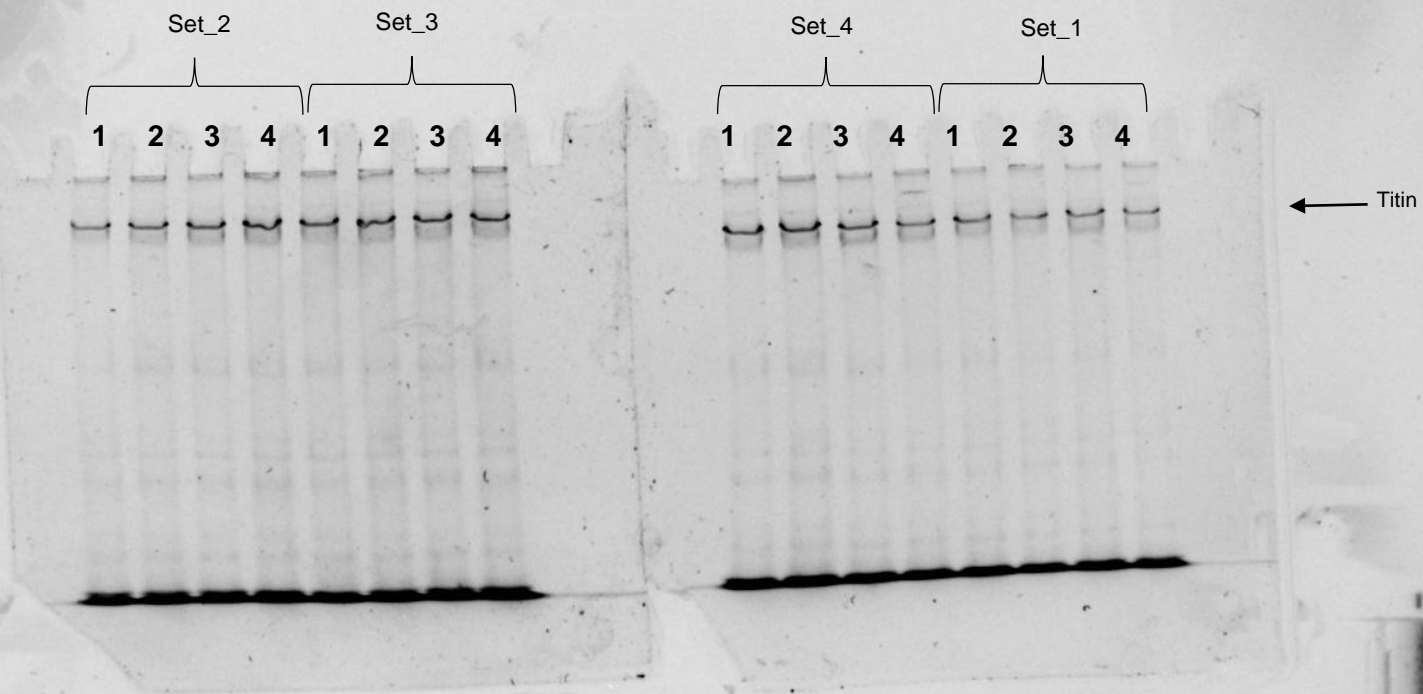

**Right ventricle Titin-total protein original gel**

1. Lean
2. Lean+Vard
3. ZDF
4. ZDF+Vard

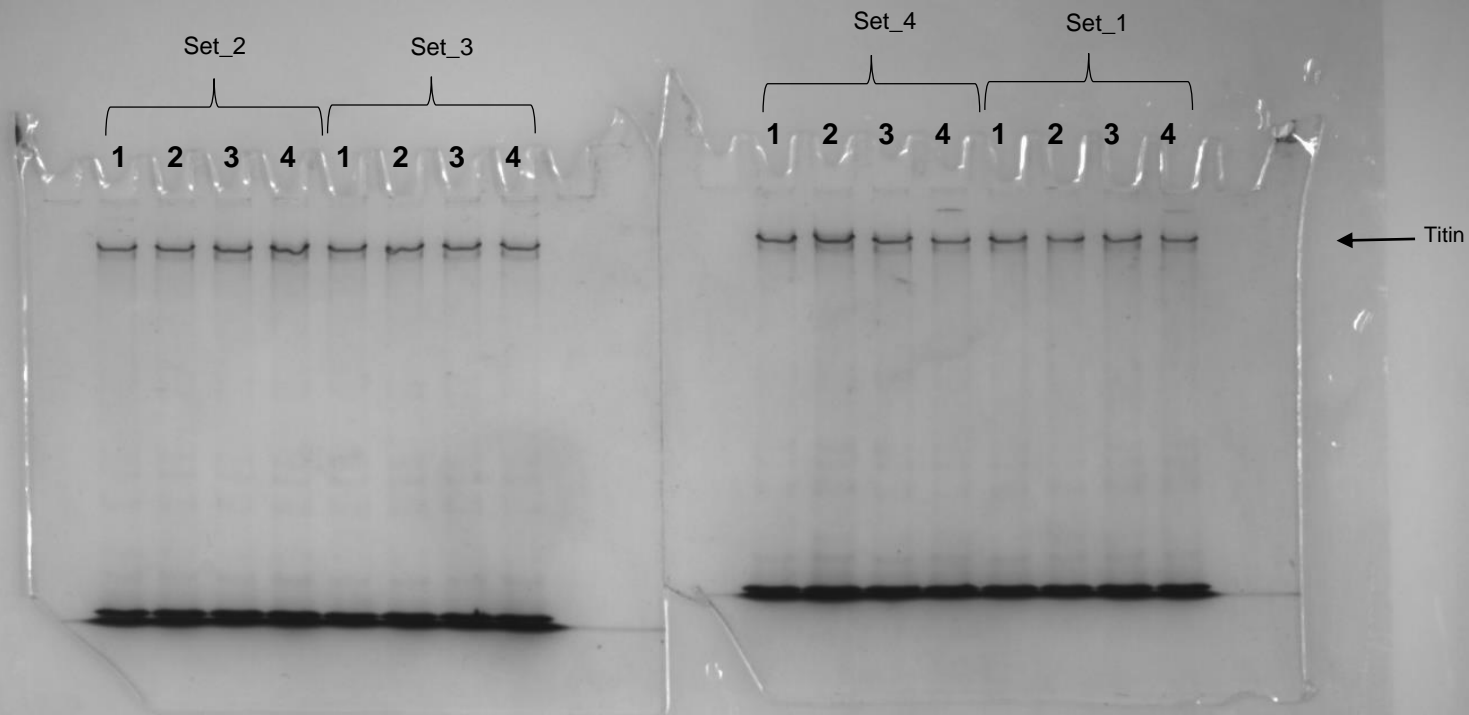



Supplementary Table S1.

|                              | LEFT VENTRICLE              |            |     |           |                 |            |     |           |  | RIGHT VENTRICLE             |            |     |           |                 |            |     |           |
|------------------------------|-----------------------------|------------|-----|-----------|-----------------|------------|-----|-----------|--|-----------------------------|------------|-----|-----------|-----------------|------------|-----|-----------|
|                              | Number of heart samples (n) |            |     |           | Number of wells |            |     |           |  | Number of heart samples (n) |            |     |           | Number of wells |            |     |           |
|                              | Lean                        | Lean +Vard | ZDF | ZDF +Vard | Lean            | Lean +Vard | ZDF | ZDF +Vard |  | Lean                        | Lean +Vard | ZDF | ZDF +Vard | Lean            | Lean +Vard | ZDF | ZDF +Vard |
| cTnI <sup>Ser-22/23-P</sup>  | 4                           | 4          | 4   | 4         | 13              | 12         | 13  | 11        |  | 4                           | 4          | 4   | 4         | 13              | 11         | 11  | 12        |
| cTnI <sup>Ser-43-P</sup>     | 5                           | 5          | 5   | 5         | 12              | 14         | 13  | 15        |  | 4                           | 4          | 4   | 4         | 10              | 9          | 11  | 11        |
| cTnI <sup>Thr-144-P</sup>    | 5                           | 5          | 5   | 5         | 15              | 13         | 12  | 12        |  | 6                           | 5          | 6   | 6         | 14              | 12         | 12  | 15        |
| cMyBP-C <sup>Ser-282-P</sup> | 5                           | 5          | 5   | 5         | 10              | 10         | 10  | 10        |  | 4                           | 4          | 4   | 4         | 8               | 8          | 8   | 8         |
| Titin-P                      | 5                           | 5          | 5   | 5         | 18              | 12         | 12  | 12        |  | 4                           | 4          | 4   | 4         | 12              | 8          | 8   | 8         |
